# Supplementary material for: IgA response and protection following nasal vaccination of chickens with Newcastle disease virus DNA vaccine nanoencapsulated with Ag@SiO2 hollow nanoparticles
Source: PubMed Central journal article supplement (PMC4864420; doi:10.1038/srep25720), 2016-05-12
Supplement: srep25720-s1.pdf [file srep25720-s1.pdf]

**IgA response and protection following nasal vaccination of chickens  
with Newcastle disease virus DNA vaccine nanoencapsulated with  
Ag@SiO<sub>2</sub> hollow nanoparticles**

Kai Zhao <sup>1,2,\*</sup>, Guangyu Rong <sup>2,4</sup>, Yan Hao <sup>2</sup>, Lu Yu <sup>2,4</sup>, Hong Kang <sup>2</sup>, Xin Wang <sup>2</sup>, Xiaohua Wang <sup>2</sup>, Zheng Jin <sup>3</sup>, Zhiyu Ren <sup>3,\*</sup>, Zejun Li <sup>4,\*</sup>

<sup>1</sup> School of Biological Science and Technology, University of Jinan, Jinan 250022, China

<sup>2</sup> Key Laboratory of Microbiology, School of Life Science, Heilongjiang University, Harbin 150080, PR China;

<sup>3</sup> Key Laboratory of Functional Inorganic Material Chemistry, Ministry of Education, Laboratory of Physical Chemistry, Key Laboratory of Chemical Engineering Process & Technology for High-efficiency Conversion, School of Chemistry and Materials Science, Heilongjiang University, Harbin 150080, PR China;

<sup>4</sup> Department of Avian Infectious Disease, Shanghai Veterinary Research Institute, Chinese Academy of Agricultural Sciences, Shanghai 200241, PR China;

Running title: Ag@SiO<sub>2</sub> nanoparticles as an efficient vaccine delivery carrier

\* Correspondence: Kai Zhao, Tel: +86 531 82767361, Fax: +86 531 89736818, E-mail:

zybin395@126.com; Zhiyu Ren, Tel: +86 0 18946066093, Fax: +86 451 51997166, E-mail:

zyren@hlju.edu.cn; Zejun Li, E-mail: lizejun@shvri.ac.cn

## Supplementary Information

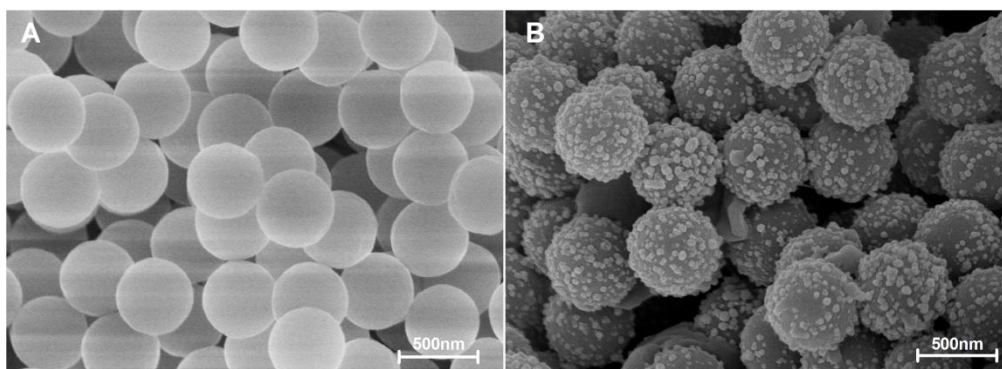

**Supplementary Figure 1. Scanning electron microscopy micrograph of (A) PS microspheres and (B) PS@Ag.**

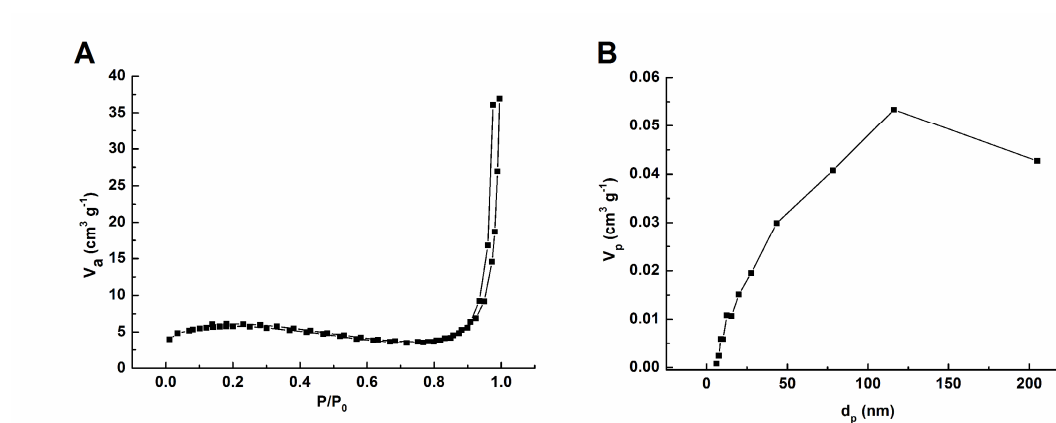

**Supplementary Figure 2. (A)  $\text{N}_2$  adsorption–desorption isotherms and (B) the corresponding BJH pore size distribution plots of samples  $\text{Ag}@\text{SiO}_2$  hollow nanoparticles.**

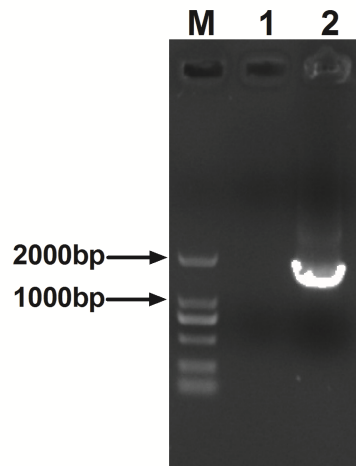

Supplementary Figure 3. The PCR amplification of F genes. Lane 1 shows F genes amplification sequences of the plasmid pVAX I -F (o) DNA treated by DNase I ; Lane 2 shows F genes amplification sequences of the pFDNA-Ag@SiO<sub>2</sub>-NPs treated by DNase I ; M: DNA Marker DL 2000.

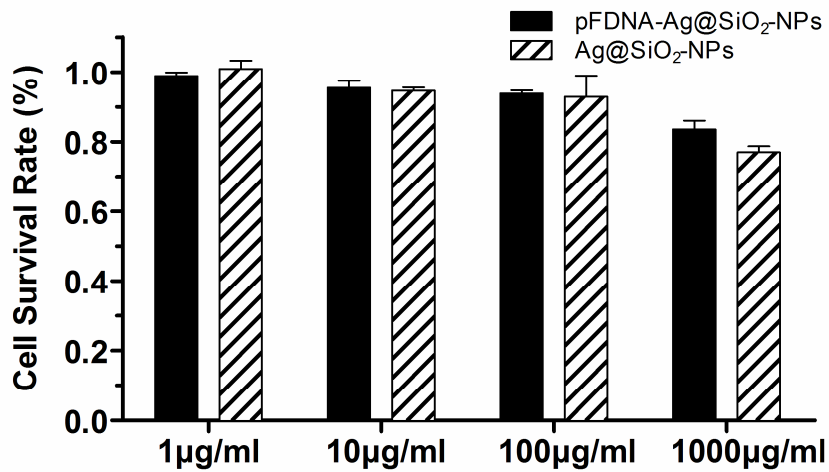

Supplementary Figure 4. *In vitro* cytotoxicity analysis of CEF cells survival ratio treated with different concentrations of pFDNA-Ag@SiO<sub>2</sub>-NPs and Ag@SiO<sub>2</sub> hollow nanoparticles. Error bar represented means of three independent experiments.
